# Supplementary material for: Protein corona formation and its influence on biomimetic magnetite nanoparticles
Source: Royal Society of Chemistry journal article supplement (doi:10.1039/c9tb02480h), 2020-01-01
Supplement: c9tb02480h1.pdf [file c9tb02480h1.pdf]

## Supporting information

### Protein corona formation and its influence on biomimetic magnetite nanoparticles

Ana Peigneux<sup>1</sup>, Emanuel A. Glitscher<sup>2</sup>, Rawan Charbaji<sup>3</sup>, Christoph Weise<sup>4</sup>,  
Stefanie Wedepohl<sup>2</sup>, Marcelo Calderón<sup>2,5,6</sup>, Concepción Jimenez-Lopez<sup>1\*</sup> and Sarah  
Hedtrich<sup>3, 7\*</sup>

<sup>1</sup>Department of Microbiology, University of Granada, Faculty of Sciences, Campus de Fuentenueva s/n,  
18002 Granada, Spain.

<sup>2</sup>Freie Universität Berlin, Institute of Chemistry and Biochemistry, Chemistry, Takustr. 3, 14195 Berlin,  
Germany.

<sup>3</sup>Freie Universität Berlin, Institute of Pharmacy, Königin-Luise-Str. 2-4, 14195 Berlin, Germany.

<sup>4</sup>Freie Universität Berlin, Institute of Chemistry and Biochemistry, Biochemistry, Thielallee 63, 14195  
Berlin, Germany.

<sup>5</sup>POLYMAT and Applied Chemistry Department, Faculty of Chemistry, University of the Basque  
Country UPV/EHU, Paseo Manuel de Lardizabal 3, 20018 Donostia-San Sebastián, Spain

<sup>6</sup>IKERBASQUE, Basque Foundation for Science, 48013 Bilbao, Spain

<sup>7</sup>University of British Columbia, Faculty of Pharmaceutical Sciences, 2405 Wesbrook Mall, Vancouver,  
BC, Canada

\* Corresponding authors; Prof. Dr. Concepción Jimenez-Lopez; email: [cjl@ugr.es](mailto:cjl@ugr.es); phone +34 958 249833;

Prof. Dr. Sarah Hedtrich, email: [sarah.hedtrich@ubc.ca](mailto:sarah.hedtrich@ubc.ca); phone: =1 604-822-2466

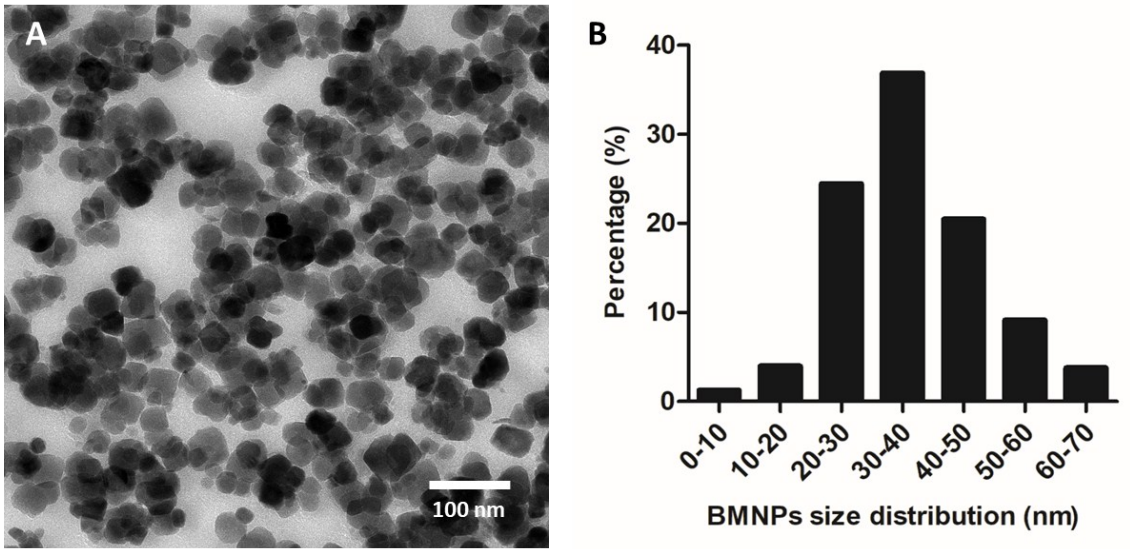

**Figure S1.** (A) Transmission electron microscopy images of biomimetic magnetic nanoparticles (BMNPs). (B) Size distribution of BMNPs.

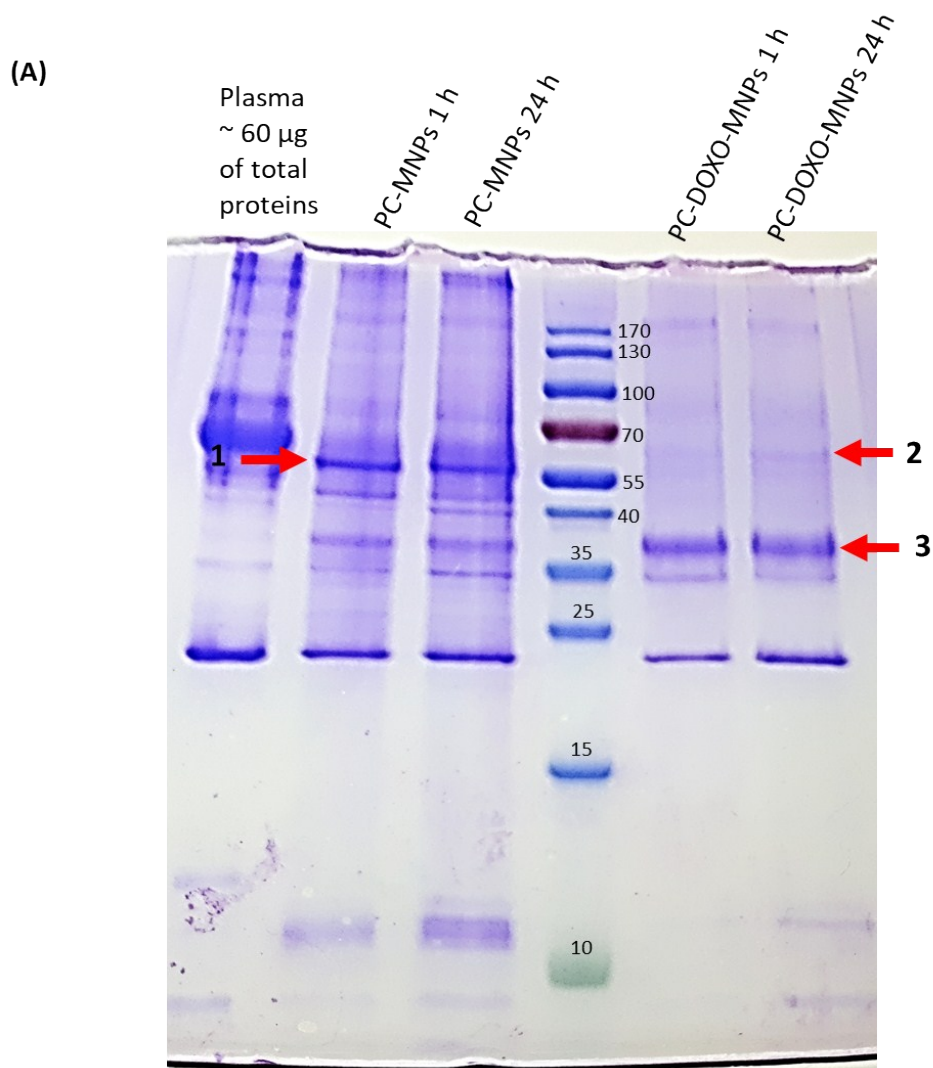

(B)

| Band # | SwissProt Accession | Protein                  | Mascot Score | Peptide matches | Sequence coverage (%) | Expect value |
|--------|---------------------|--------------------------|--------------|-----------------|-----------------------|--------------|
| 1      | FIBB_HUMAN          | Fibrinogen beta (57 kDa) | 170          | 23              | 43                    | 5.6e-12      |
| 2      | FIBB_HUMAN          | Fibrinogen beta (57 kDa) | 70           | 11              | 29                    | 1.9e-3       |
| 3      | CLUS_HUMAN          | Clusterin (53 kDa)       | 74           | 11              | 23                    | 7.7e-4       |

**Figure S2.** (A) Protein binding profiles of inorganic magnetite nanoparticles (MNPs). Protein constituents of full human plasma and BMNPs with and without doxorubicin (DOXO) coupled, followed by 1 or 24 h incubation with human plasma (PC-(DOXO)-MNPs 1 or 24 h). Proteins were separated by one-dimensional SDS-PAGE and visualized by Coomassie Brilliant Blue staining. (B) Protein constituents of inorganic magnetite nanoparticles (MNPs) bearing protein corona, as determined by trypsin peptide mass fingerprints recorded using MALDI-TOF-MS.

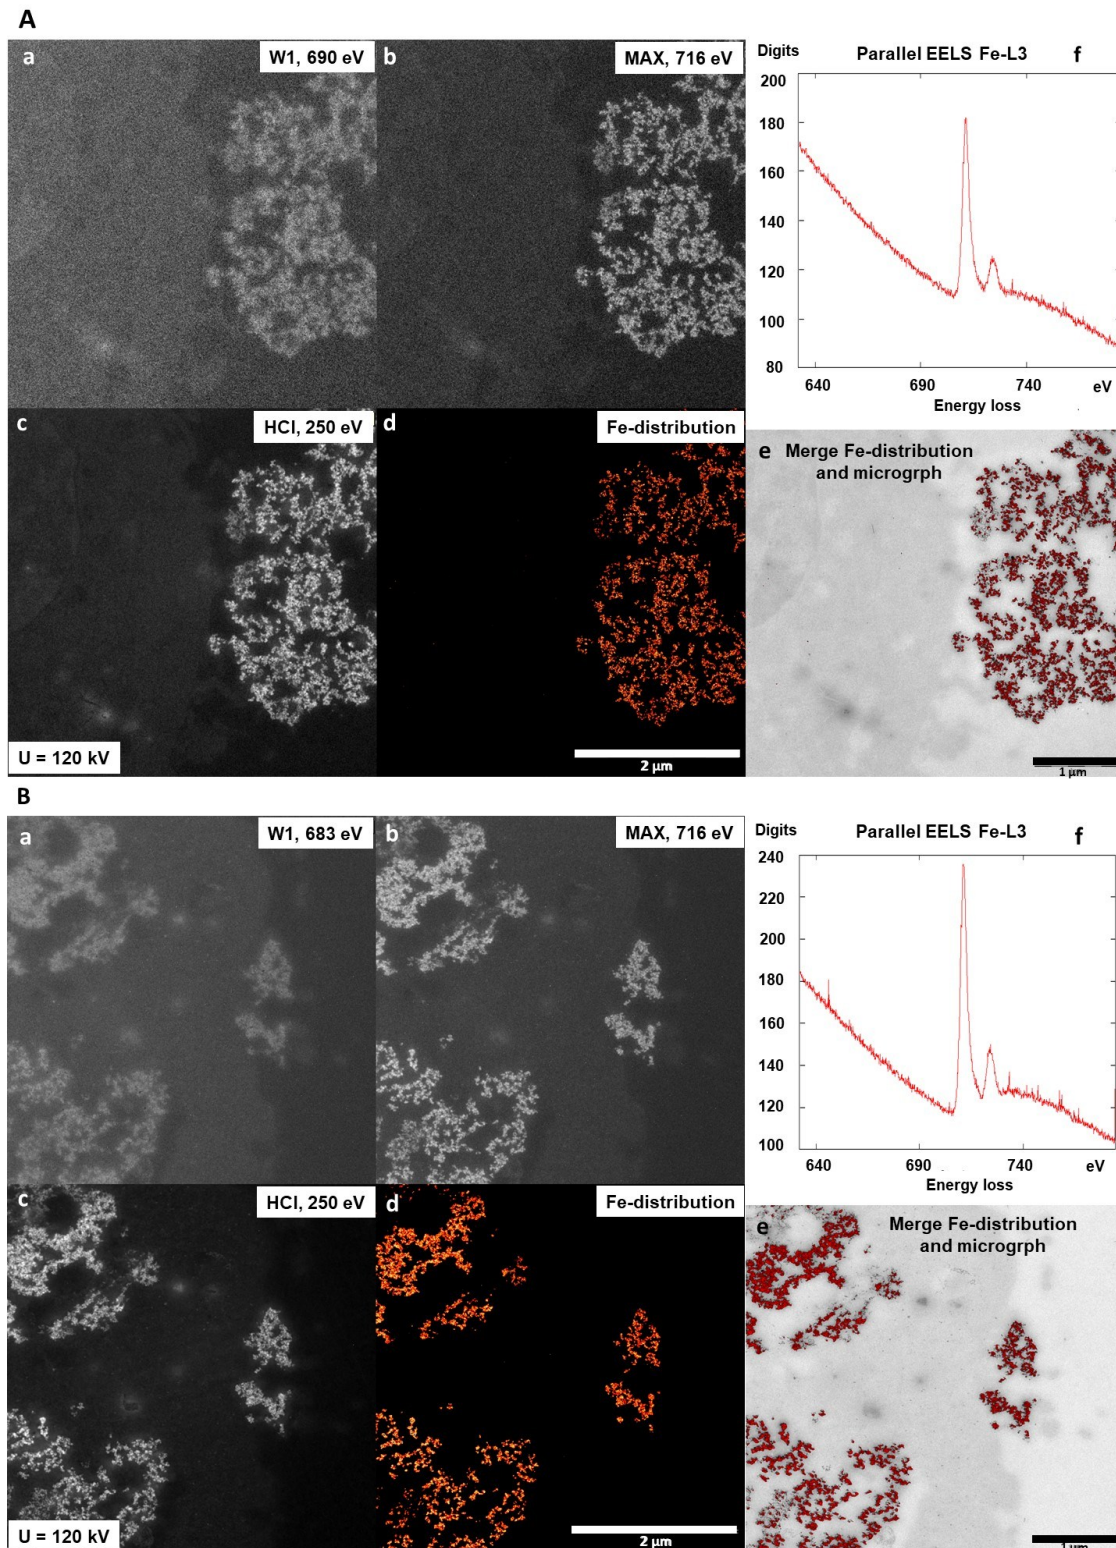

**Figure S3.** Elemental mapping by electron spectroscopy imaging – Transmission electron microscopy (ESI-TEM) (a-e) and electron energy loss spectroscopy (EELS) (f) of BMNPs either (**A**) outside or (**B**) inside the cells.



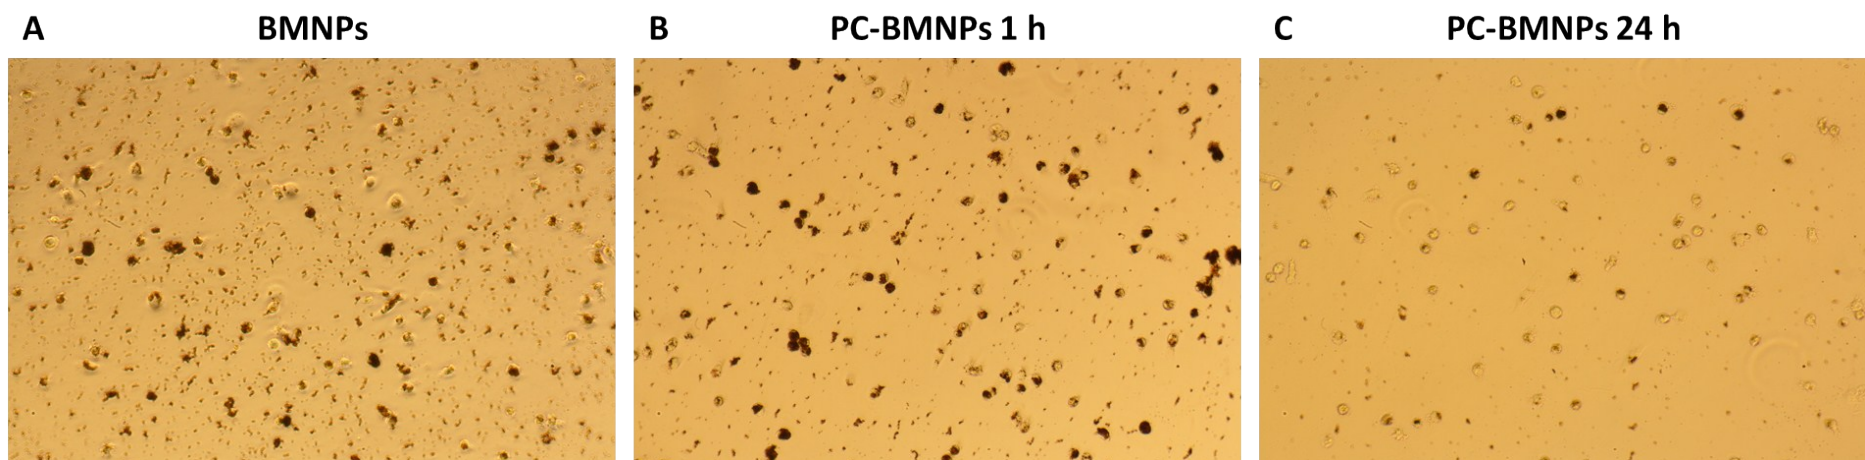

**Figure S4.** Primary human macrophages cultured with (A) BMNPs, (B) PC-BMNPs 1h and (C) PC-BMNPs 24 h after 4 h incubation at 37 °C and 5% CO<sub>2</sub>.
